# Supplementary material for: WRKY23 is a component of the transcriptional network mediating auxin feedback on PIN polarity
Source: PubMed Central journal article supplement (PMC5805370; doi:10.1371/journal.pgen.1007177), 2018-01-29

**S2 Figure**

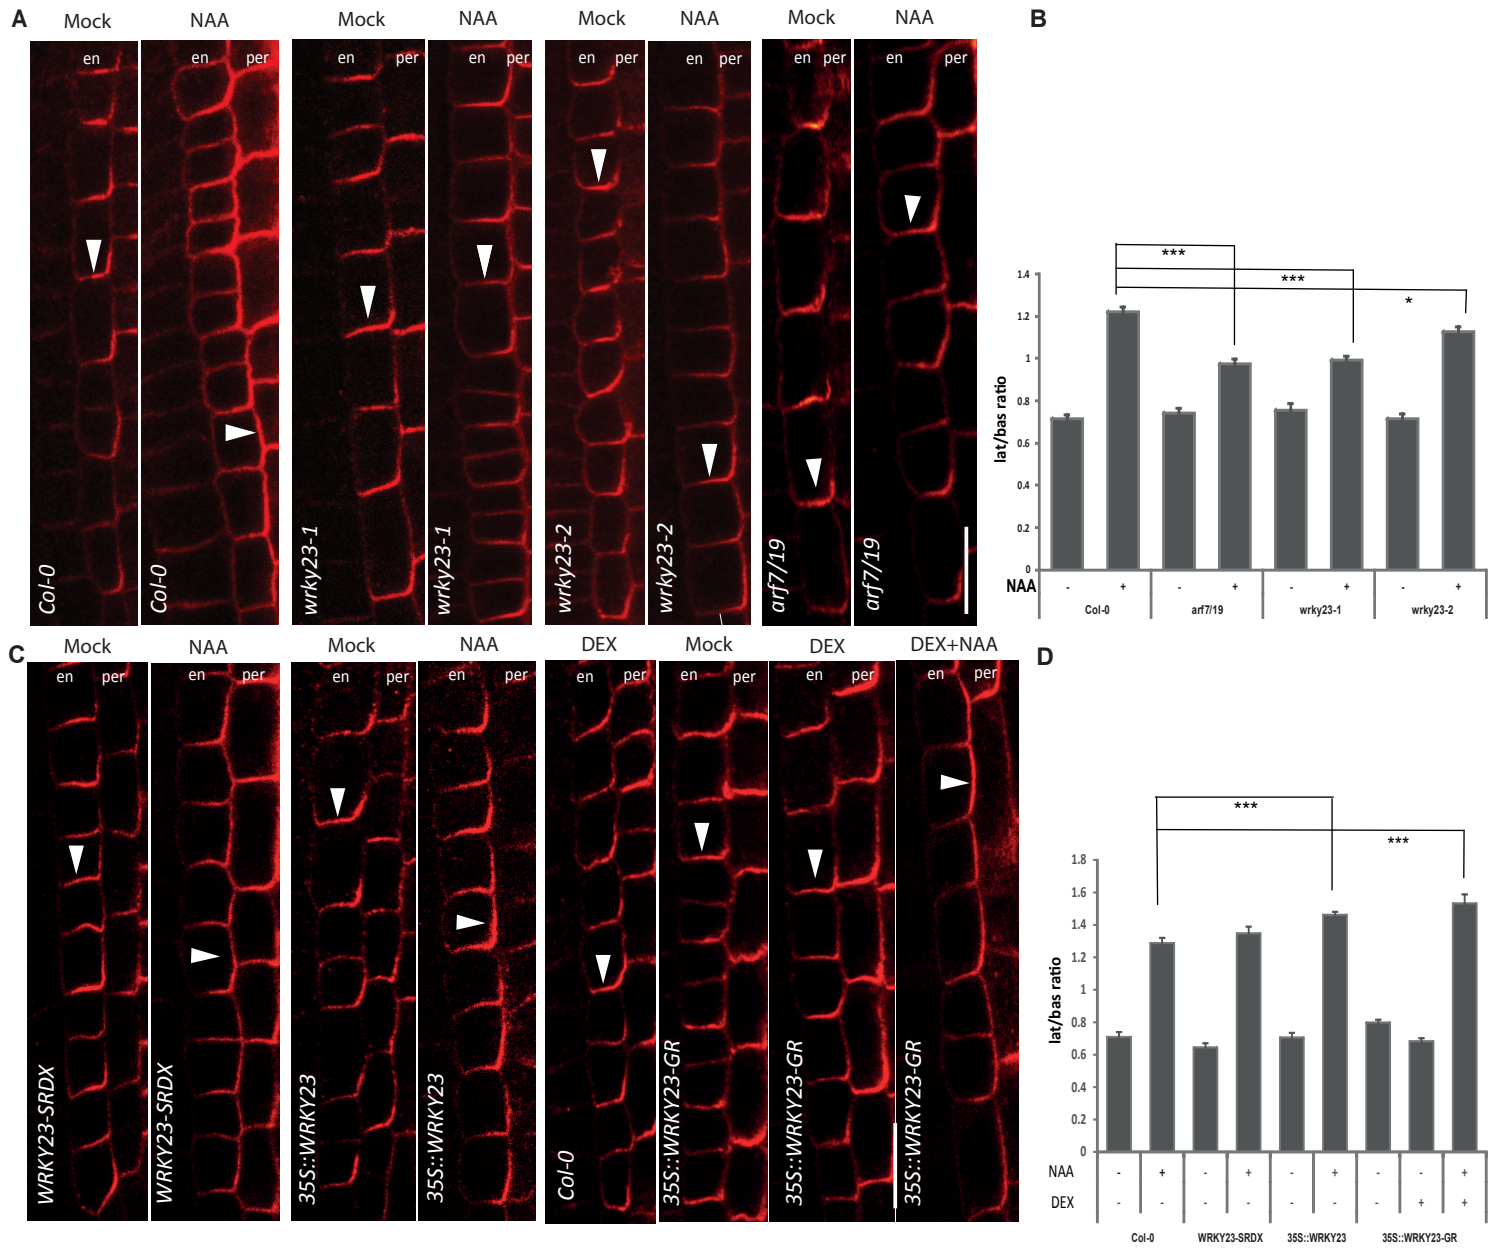

Supplement: pgen.1007177.s002.pdf [file pgen.1007177.s002.pdf]
