# Supplementary material for: WRKY23 is a component of the transcriptional network mediating auxin feedback on PIN polarity
Source: PubMed Central journal article supplement (PMC5805370; doi:10.1371/journal.pgen.1007177), 2018-01-29

S3 Figure

A

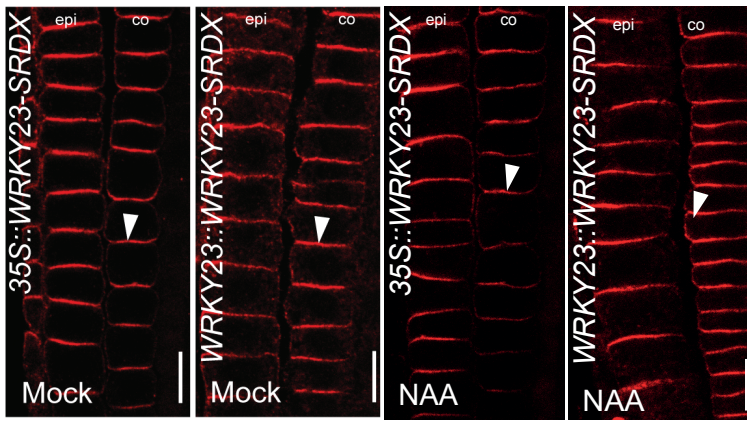

C

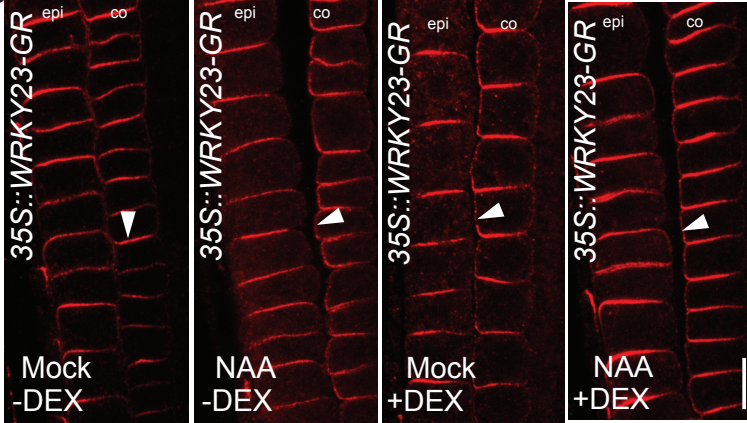

B

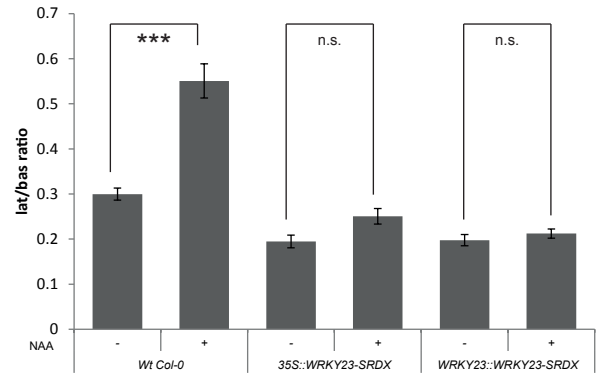

D

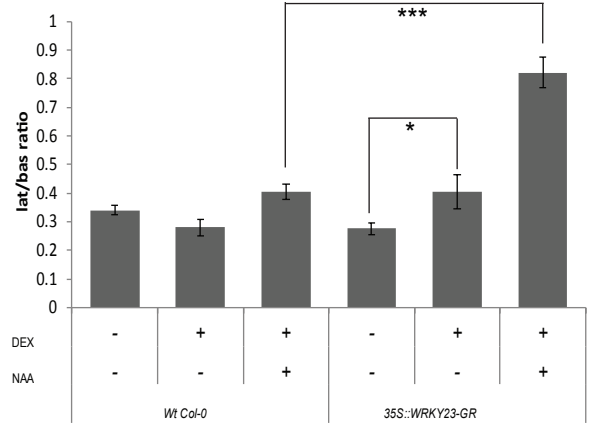

Supplement: pgen.1007177.s003.pdf [file pgen.1007177.s003.pdf]
