# Supplementary material for: WRKY23 is a component of the transcriptional network mediating auxin feedback on PIN polarity
Source: PubMed Central journal article supplement (PMC5805370; doi:10.1371/journal.pgen.1007177), 2018-01-29
Supplement: pgen.1007177.s005.pdf [file pgen.1007177.s005.pdf]

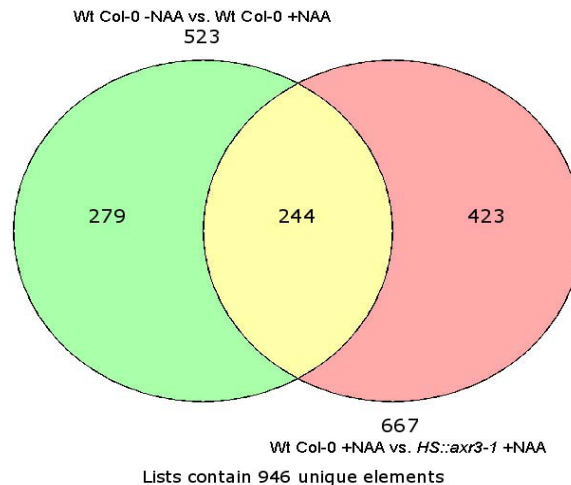

B

| Locus identifier | Primary Gene Symbol                                  | Gene Model Description                                                                                                                                                                                                                                                                                                                                                                                                                                                                                                                                                                                                                                                                                                                                                                                                                     |
|------------------|------------------------------------------------------|--------------------------------------------------------------------------------------------------------------------------------------------------------------------------------------------------------------------------------------------------------------------------------------------------------------------------------------------------------------------------------------------------------------------------------------------------------------------------------------------------------------------------------------------------------------------------------------------------------------------------------------------------------------------------------------------------------------------------------------------------------------------------------------------------------------------------------------------|
| AT1G02400        | GIBBERELLIN 2-OXIDASE 6 (GA2OX6)                     | Encodes a gibberellin 2-oxidase that acts on C19 gibberellins but not C20 gibberellins.                                                                                                                                                                                                                                                                                                                                                                                                                                                                                                                                                                                                                                                                                                                                                    |
| AT1G02850        | BETA GLUCOSIDASE 11 (BGLU11)                         | beta glucosidase 11 (BGLU11)                                                                                                                                                                                                                                                                                                                                                                                                                                                                                                                                                                                                                                                                                                                                                                                                               |
| AT1G03820        |                                                      | unknown protein                                                                                                                                                                                                                                                                                                                                                                                                                                                                                                                                                                                                                                                                                                                                                                                                                            |
| AT1G03870        | FASCICLIN-LIKE ARABINOOGALACTAN 9 (FLA9)             | fasciclin-like arabinogalactan-protein 9 (Fla9)                                                                                                                                                                                                                                                                                                                                                                                                                                                                                                                                                                                                                                                                                                                                                                                            |
| AT1G04040        |                                                      | HAD superfamily, subfamily IIB acid phosphatase                                                                                                                                                                                                                                                                                                                                                                                                                                                                                                                                                                                                                                                                                                                                                                                            |
| AT1G05530        | UDP-GLUCOSYL TRANSFERASE 75B2 (UGT75B2)              | Encodes a protein with glucosyltransferase activity with high sequence homology to UGT1 (AT1G05560). It belongs to an UGT subfamily that binds UDP-glucose but not UDP-glucuronate, UDP-galactose, or UDP-rhamnose as the glycosyl donor. UGT2 was shown to be able to use abscisic acid as glycosylation substrate in the presence of UDP-glucose.                                                                                                                                                                                                                                                                                                                                                                                                                                                                                        |
| AT1G08500        | EARLY NODULIN-LIKE PROTEIN 18 (ENODL18)              | early-nodulin-like protein 18 (ENODL18); FUNCTIONS IN: electron carrier activity, copper ion binding; LOCATED IN: anchored to membrane;                                                                                                                                                                                                                                                                                                                                                                                                                                                                                                                                                                                                                                                                                                    |
| AT1G14350        | FOUR LIPS (FLP)                                      | Encodes a putative MYB transcription factor involved in stomata development, loss of FLP activity results in a failure of guard mother cells (GMCs) to adopt the guard cell fate, thus they continue to divide resulting in abnormal stomata consisting of clusters of numerous guard cell-like cells. This phenotype is enhanced in double mutants with MYB88.                                                                                                                                                                                                                                                                                                                                                                                                                                                                            |
| AT1G14540        |                                                      | Peroxidase superfamily protein                                                                                                                                                                                                                                                                                                                                                                                                                                                                                                                                                                                                                                                                                                                                                                                                             |
| AT1G15210        | ATP-BINDING CASSETTE G35 (ABCG35)                    | pleiotropic drug resistance 7 (PDR7)                                                                                                                                                                                                                                                                                                                                                                                                                                                                                                                                                                                                                                                                                                                                                                                                       |
| AT1G15580        | INDOLE-3-ACETIC ACID INDUCIBLE 5 (IAA5)              | auxin induced protein                                                                                                                                                                                                                                                                                                                                                                                                                                                                                                                                                                                                                                                                                                                                                                                                                      |
| AT1G19220        | AUXIN RESPONSE FACTOR 19 (ARF19)                     | Encodes an auxin response factor that contains the conserved VP1-B3 DNA-binding domain at its N-terminus and the Aux/IAA-like domains III and IV present in most ARFs at its C-terminus. The protein interacts with IAA1 (yeast two hybrid) and other auxin response elements such as ER7 and ER9 (yeast one hybrid). ARF19 protein can complement many aspects of the arf7 mutant phenotype and, together with ARF7, is involved in the response to ethylene. In the arf7 arf19 double mutant, several auxin-responsive genes (e.g. IAA5, LBD16, LBD29 and LBD33) are no longer upregulated by auxin.                                                                                                                                                                                                                                     |
| AT1G21980        | PHOSPHATIDYLINOSITOL 4-PHOSPHATE 5-KINASE 1 (PIP5K1) | Type I phosphatidylinositol-4-phosphate 5-kinase. Preferentially phosphorylates PtdIns4P. Induced by water stress and abscisic acid in Arabidopsis thaliana. Expressed in procambial cells of leaves, flowers and roots. A N-terminal Membrane Occupation and Recognition Nexus (MORN) affects enzyme activity and distribution.                                                                                                                                                                                                                                                                                                                                                                                                                                                                                                           |
| AT1G22330        |                                                      | RNA-binding (RRM/RBD/RNP motifs) family protein                                                                                                                                                                                                                                                                                                                                                                                                                                                                                                                                                                                                                                                                                                                                                                                            |
| AT1G22530        | PATELLIN 2 (PATL2)                                   | PATELLIN 2 (PATL2)                                                                                                                                                                                                                                                                                                                                                                                                                                                                                                                                                                                                                                                                                                                                                                                                                         |
| AT1G23080        | PIN-FORMED 7 (PIN7)                                  | Encodes a novel component of auxin efflux that is located apically in the basal cell and is involved during embryogenesis in setting up the apical-basal axis in the embryo. It is also involved in pattern specification during root development. In roots, it is expressed at lateral and basal membranes of provascular cells in the meristem and elongation zone, whereas in the columella cells it coincides with the PIN3 domain. Plasma membrane-localized PIN proteins mediate a saturable efflux of auxin. PINs mediate auxin efflux from mammalian and yeast cells without needing additional plant-specific factors. The action of PINs in auxin efflux is distinct from PGP, rate-limiting, specific to auxins and sensitive to auxin transport inhibitors. PINs are directly involved of in catalyzing cellular auxin efflux. |
| AT1G25230        |                                                      | Calcineurin-like metallo-phosphoesterase superfamily protein;                                                                                                                                                                                                                                                                                                                                                                                                                                                                                                                                                                                                                                                                                                                                                                              |
| AT1G25450        | 3-KETOACYL-COA SYNTHASE 5 (KCS5)                     | Encodes KCS5, a member of the 3-ketoacyl-CoA synthase family involved in the biosynthesis of VLCFA (very long chain fatty acids).                                                                                                                                                                                                                                                                                                                                                                                                                                                                                                                                                                                                                                                                                                          |
| AT1G28370        | ERF DOMAIN PROTEIN 11 (ERF11)                        | encodes a member of the ERF (ethylene response factor) subfamily B-1 of ERF/AP2 transcription factor family. The protein contains one AP2 domain. There are 15 members in this subfamily including ATERF-3, ATERF-4, ATERF-7, and leafy petiole.                                                                                                                                                                                                                                                                                                                                                                                                                                                                                                                                                                                           |
| AT1G28380        | NECROTIC SPOTTED LESIONS 1 (NSL1)                    | This gene is predicted to encode a protein involved in negatively regulating salicylic acid-related defense responses and cell death programs.                                                                                                                                                                                                                                                                                                                                                                                                                                                                                                                                                                                                                                                                                             |
| AT1G28680        |                                                      | HXXXD-type acyl-transferase family protein                                                                                                                                                                                                                                                                                                                                                                                                                                                                                                                                                                                                                                                                                                                                                                                                 |
| AT1G29500        |                                                      | SAUR-like auxin-responsive protein family                                                                                                                                                                                                                                                                                                                                                                                                                                                                                                                                                                                                                                                                                                                                                                                                  |
| AT1G29510        | SMALL AUXIN UPREGULATED 68 (SAUR68)                  | SMALL AUXIN UPREGULATED 68 (SAUR68);                                                                                                                                                                                                                                                                                                                                                                                                                                                                                                                                                                                                                                                                                                                                                                                                       |
| AT1G33590        |                                                      | Leucine-rich repeat (LRR) family protein                                                                                                                                                                                                                                                                                                                                                                                                                                                                                                                                                                                                                                                                                                                                                                                                   |
| AT1G33790        |                                                      | jacalin lectin family protein;                                                                                                                                                                                                                                                                                                                                                                                                                                                                                                                                                                                                                                                                                                                                                                                                             |
| AT1G50660        |                                                      | unknown protein;                                                                                                                                                                                                                                                                                                                                                                                                                                                                                                                                                                                                                                                                                                                                                                                                                           |
| AT1G52050        |                                                      | Mannose-binding lectin superfamily protein;                                                                                                                                                                                                                                                                                                                                                                                                                                                                                                                                                                                                                                                                                                                                                                                                |
| AT1G52830        | INDOLE-3-ACETIC ACID 6 (IAA6)                        | An extragenic dominant suppressor of the hy2 mutant phenotype. Also exhibits aspects of constitutive photomorphogenic phenotype in the absence of hy2. Mutants have dominant leaf curling phenotype shortened hypocotyls and reduced apical hook. Induced by indole-3-acetic acid.                                                                                                                                                                                                                                                                                                                                                                                                                                                                                                                                                         |
| AT1G55330        | ARABINOOGALACTAN PROTEIN 21 (AGP21)                  | Encodes a putative arabinogalactan-protein (AGP21).                                                                                                                                                                                                                                                                                                                                                                                                                                                                                                                                                                                                                                                                                                                                                                                        |

| Locus identifier | Primary Gene Symbol                                   | Gene Model Description                                                                                                                                                                                                                                                                                                                                                                                                                                                                                                                                                                                                                                                                                                                                                                                                                                                                                                                                                                                                                                                                                                                                                                                                                                                                                                                 |
|------------------|-------------------------------------------------------|----------------------------------------------------------------------------------------------------------------------------------------------------------------------------------------------------------------------------------------------------------------------------------------------------------------------------------------------------------------------------------------------------------------------------------------------------------------------------------------------------------------------------------------------------------------------------------------------------------------------------------------------------------------------------------------------------------------------------------------------------------------------------------------------------------------------------------------------------------------------------------------------------------------------------------------------------------------------------------------------------------------------------------------------------------------------------------------------------------------------------------------------------------------------------------------------------------------------------------------------------------------------------------------------------------------------------------------|
| AT1G55740        | SEED IMBIBITION 1 (SIP1)                              | seed imbibition 1 (SIP1)                                                                                                                                                                                                                                                                                                                                                                                                                                                                                                                                                                                                                                                                                                                                                                                                                                                                                                                                                                                                                                                                                                                                                                                                                                                                                                               |
| AT1G56020        |                                                       | unknown protein                                                                                                                                                                                                                                                                                                                                                                                                                                                                                                                                                                                                                                                                                                                                                                                                                                                                                                                                                                                                                                                                                                                                                                                                                                                                                                                        |
| AT1G60000        |                                                       | RNA-binding (RRM/RBD/RNP motifs) family protein                                                                                                                                                                                                                                                                                                                                                                                                                                                                                                                                                                                                                                                                                                                                                                                                                                                                                                                                                                                                                                                                                                                                                                                                                                                                                        |
| AT1G60010        |                                                       | unknown protein                                                                                                                                                                                                                                                                                                                                                                                                                                                                                                                                                                                                                                                                                                                                                                                                                                                                                                                                                                                                                                                                                                                                                                                                                                                                                                                        |
| AT1G62770        |                                                       | Plant invertase/pectin methylesterase inhibitor superfamily protein                                                                                                                                                                                                                                                                                                                                                                                                                                                                                                                                                                                                                                                                                                                                                                                                                                                                                                                                                                                                                                                                                                                                                                                                                                                                    |
| AT1G63830        |                                                       | PLAC8 family protein;                                                                                                                                                                                                                                                                                                                                                                                                                                                                                                                                                                                                                                                                                                                                                                                                                                                                                                                                                                                                                                                                                                                                                                                                                                                                                                                  |
| AT1G64390        | GLYCOSYL HYDROLASE 9C2 (GH9C2)                        | glycosyl hydrolase 9C2 (GH9C2)                                                                                                                                                                                                                                                                                                                                                                                                                                                                                                                                                                                                                                                                                                                                                                                                                                                                                                                                                                                                                                                                                                                                                                                                                                                                                                         |
| AT1G64405        |                                                       | unknown protein                                                                                                                                                                                                                                                                                                                                                                                                                                                                                                                                                                                                                                                                                                                                                                                                                                                                                                                                                                                                                                                                                                                                                                                                                                                                                                                        |
| AT1G69530        | EXPANSIN A1 (EXPA1)                                   | Member of Alpha-Expansin Gene Family. Naming convention from the Expansin Working Group (Kende et al. Plant Mol Bio). Involved in the formation of nematode-induced syncytia in roots of Arabidopsis thaliana.                                                                                                                                                                                                                                                                                                                                                                                                                                                                                                                                                                                                                                                                                                                                                                                                                                                                                                                                                                                                                                                                                                                         |
| AT1G70230        | TRICHOME BIREFRINGENCE-LIKE 27 (TBL27)                | Encodes a member of the TBL (TRICHOME BIREFRINGENCE-LIKE) gene family containing a plant-specific DUF231 (domain of unknown function) domain. TBL gene family has 46 members, two of which (TBR/AT5G06700 and TBL3/AT5G01360) have been shown to be involved in the synthesis and deposition of secondary wall cellulose, presumably by influencing the esterification state of pectic polymers. A nomenclature for this gene family has been proposed (Volker Bischoff & Wolf Scheible, 2010, personal communication).                                                                                                                                                                                                                                                                                                                                                                                                                                                                                                                                                                                                                                                                                                                                                                                                                |
| AT1G70560        | TRYPTOPHAN AMINOTRANSFERASE OF ARABIDOPSIS 1 (TAA1)   | TAA1 is involved in the shade-induced production of indole-3-pyruvate (IPA), a precursor to IAA, a biologically active auxin. It is also involved in regulating many aspects of plant growth and development from embryogenesis to flower formation and plays a role in ethylene-mediated signaling. This enzyme can catalyze the formation of IPA from L-tryptophan. Though L-Trp is expected to be the preferred substrate <i>in vivo</i> , TAA1 also acts as an aminotransferase using L-Phe, L-Tyr, L-Leu, L-Ala, L-Met, and L-Gln.                                                                                                                                                                                                                                                                                                                                                                                                                                                                                                                                                                                                                                                                                                                                                                                                |
| AT1G70940        | PIN-FORMED 3 (PIN3)                                   | A regulator of auxin efflux and involved in differential growth. PIN3 is expressed in gravity-sensing tissues, with PIN3 protein accumulating predominantly at the lateral cell surface. PIN3 localizes to the plasma membrane and to vesicles. In roots, PIN3 is expressed without pronounced polarity in tiers two and three of the columella cells, at the basal side of vascular cells, and to the lateral side of pericycle cells of the elongation zone. PIN3 overexpression inhibits root cell growth. Protein phosphorylation plays a role in PIN3 trafficking to the plasma membrane.                                                                                                                                                                                                                                                                                                                                                                                                                                                                                                                                                                                                                                                                                                                                         |
| AT1G72900        |                                                       | Toll-Interleukin-Resistance (TIR) domain-containing protein;                                                                                                                                                                                                                                                                                                                                                                                                                                                                                                                                                                                                                                                                                                                                                                                                                                                                                                                                                                                                                                                                                                                                                                                                                                                                           |
| AT1G73590        | PIN-FORMED 1 (PIN1)                                   | Encodes an auxin efflux carrier involved in shoot and root development. It is involved in the maintenance of embryonic auxin gradients. Loss of function severely affects organ initiation, pin1 mutants are characterised by an inflorescence meristem that does not initiate any flowers, resulting in the formation of a naked inflorescence stem. PIN1 is involved in the determination of leaf shape by actively promoting development of leaf margin serrations. In roots, the protein mainly resides at the basal end of the vascular cells, but weak signals can be detected in the epidermis and the cortex. Expression levels and polarity of this auxin efflux carrier change during primordium development suggesting that cycles of auxin build-up and depletion accompany, and may direct, different stages of primordium development. PIN1 action on plant development does not strictly require function of PGP1 and PGP19 proteins.                                                                                                                                                                                                                                                                                                                                                                                   |
| AT1G73620        |                                                       | Pathogenesis-related thaumatin superfamily protein                                                                                                                                                                                                                                                                                                                                                                                                                                                                                                                                                                                                                                                                                                                                                                                                                                                                                                                                                                                                                                                                                                                                                                                                                                                                                     |
| AT1G73780        |                                                       | Bifunctional inhibitor/lipid-transfer protein/seed storage 2S albumin superfamily protein;                                                                                                                                                                                                                                                                                                                                                                                                                                                                                                                                                                                                                                                                                                                                                                                                                                                                                                                                                                                                                                                                                                                                                                                                                                             |
| AT1G74660        | MINI ZINC FINGER 1 (MIF1)                             | Encodes MINI ZINC FINGER 1 (MIF1) which has a zinc finger domain but lacks other protein motifs normally present in transcription factors. MIF1 physically interact with a group of zinc finger-homeodomain (ZHD) transcription factors, such as ZHD5 (AT1G75240), that regulate floral architecture and leaf development. Gel mobility shift assays revealed that MIF1 blocks the DNA binding activity of ZHD5 homodimers by competitively forming MIF1-ZHD5 heterodimers. Constitutive overexpression of MIF1 caused dramatic developmental defects, seedlings were non-responsive to gibberellin (GA) for cell elongation, hypersensitive to the GA synthesis inhibitor paclobutrazol (PAC) and abscisic acid (ABA), and hypersensitive to auxin, brassinosteroid and cytokinin, but normally responsive to ethylene.                                                                                                                                                                                                                                                                                                                                                                                                                                                                                                               |
| AT1G74790        |                                                       | catalytics                                                                                                                                                                                                                                                                                                                                                                                                                                                                                                                                                                                                                                                                                                                                                                                                                                                                                                                                                                                                                                                                                                                                                                                                                                                                                                                             |
| AT1G75500        | WALLS ARE THIN 1 (WAT1)                               | An Arabidopsis thaliana homolog of Medicago truncatula NODULIN21 (MtN21). The gene encodes a plant-specific, predicted integral membrane protein and is a member of the Plant-Drug/Metabolite Exporter (P-DME) family (Transporter Classification number: TC 2.A.7.3).                                                                                                                                                                                                                                                                                                                                                                                                                                                                                                                                                                                                                                                                                                                                                                                                                                                                                                                                                                                                                                                                 |
| AT1G77280        |                                                       | Protein kinase protein with adenine nucleotide alpha hydrolases-like domain                                                                                                                                                                                                                                                                                                                                                                                                                                                                                                                                                                                                                                                                                                                                                                                                                                                                                                                                                                                                                                                                                                                                                                                                                                                            |
| AT1G78100        |                                                       | F-box family protein;                                                                                                                                                                                                                                                                                                                                                                                                                                                                                                                                                                                                                                                                                                                                                                                                                                                                                                                                                                                                                                                                                                                                                                                                                                                                                                                  |
| AT1G78420        |                                                       | RING/U-box superfamily protein                                                                                                                                                                                                                                                                                                                                                                                                                                                                                                                                                                                                                                                                                                                                                                                                                                                                                                                                                                                                                                                                                                                                                                                                                                                                                                         |
| AT2G01430        | HOMEBOX-LEUCINE ZIPPER PROTEIN 17 (HB17)              | homeobox-leucine zipper protein 17 (HB17);                                                                                                                                                                                                                                                                                                                                                                                                                                                                                                                                                                                                                                                                                                                                                                                                                                                                                                                                                                                                                                                                                                                                                                                                                                                                                             |
| AT2G01910        | (ATMAP65-6)                                           | Binds microtubules. Induces a crisscross mesh of microtubules, not bundles. Not involved in microtubule polymerization nor nucleation. Localizes to mitochondria.                                                                                                                                                                                                                                                                                                                                                                                                                                                                                                                                                                                                                                                                                                                                                                                                                                                                                                                                                                                                                                                                                                                                                                      |
| AT2G02620        |                                                       | Cysteine/Histidine-rich C1 domain family protein                                                                                                                                                                                                                                                                                                                                                                                                                                                                                                                                                                                                                                                                                                                                                                                                                                                                                                                                                                                                                                                                                                                                                                                                                                                                                       |
| AT2G03730        | ACT DOMAIN REPEAT 5 (ACR5)                            | Member of a small family of ACT domain containing proteins. ACT domains are thought to be involved in amino acid binding.                                                                                                                                                                                                                                                                                                                                                                                                                                                                                                                                                                                                                                                                                                                                                                                                                                                                                                                                                                                                                                                                                                                                                                                                              |
| AT2G03830        | ROOT MERISTEM GROWTH FACTOR 8 (RGF8)                  | Encodes a root meristem growth factor (RGF). Belongs to a family of functionally redundant homologous peptides that are secreted, tyrosine-sulfated, and expressed mainly in the stem cell area and the innermost layer of central columella cells. RGFs are required for maintenance of the root stem cell niche and transit amplifying cell proliferation. Members of this family include: At5g60810 (RGF1), At1g13620 (RGF2), At2g04025 (RGF3), At3g30350 (RGF4), At5g51451 (RGF5), At4g16515 (RGF6), At3g02240 (RGF7), At2g03830 (RGF8) and At5g64770 (RGF9).                                                                                                                                                                                                                                                                                                                                                                                                                                                                                                                                                                                                                                                                                                                                                                      |
| AT2G05940        |                                                       | Protein kinase superfamily protein;                                                                                                                                                                                                                                                                                                                                                                                                                                                                                                                                                                                                                                                                                                                                                                                                                                                                                                                                                                                                                                                                                                                                                                                                                                                                                                    |
| AT2G14960        | (GH3.1)                                               | encodes a protein similar to IAA-amido synthases. Lines carrying an insertion in this gene are hypersensitive to auxin.                                                                                                                                                                                                                                                                                                                                                                                                                                                                                                                                                                                                                                                                                                                                                                                                                                                                                                                                                                                                                                                                                                                                                                                                                |
| AT2G18690        |                                                       | unknown protein;                                                                                                                                                                                                                                                                                                                                                                                                                                                                                                                                                                                                                                                                                                                                                                                                                                                                                                                                                                                                                                                                                                                                                                                                                                                                                                                       |
| AT2G18800        | XYLOGLUCAN ENDOTRANSGLUCOSYLASE/HYDROLASE 21 (XTH21)  | xyloglucan endotransglucosylase/hydrolase 21 (XTH21);                                                                                                                                                                                                                                                                                                                                                                                                                                                                                                                                                                                                                                                                                                                                                                                                                                                                                                                                                                                                                                                                                                                                                                                                                                                                                  |
| AT2G18980        |                                                       | Peroxidase superfamily protein                                                                                                                                                                                                                                                                                                                                                                                                                                                                                                                                                                                                                                                                                                                                                                                                                                                                                                                                                                                                                                                                                                                                                                                                                                                                                                         |
| AT2G22500        | UNCOUPLING PROTEIN 5 (UCP5)                           | Encodes one of the mitochondrial dicarboxylate carriers (DIC): DIC1 (AT2G22500), DIC2 (AT4G24570), DIC3 (AT5G09470).                                                                                                                                                                                                                                                                                                                                                                                                                                                                                                                                                                                                                                                                                                                                                                                                                                                                                                                                                                                                                                                                                                                                                                                                                   |
| AT2G23170        | (GH3.3)                                               | encodes an IAA-amido synthase that conjugates Asp and other amino acids to auxin <i>in vitro</i> .                                                                                                                                                                                                                                                                                                                                                                                                                                                                                                                                                                                                                                                                                                                                                                                                                                                                                                                                                                                                                                                                                                                                                                                                                                     |
| AT2G25790        |                                                       | Leucine-rich receptor-like protein kinase family protein;                                                                                                                                                                                                                                                                                                                                                                                                                                                                                                                                                                                                                                                                                                                                                                                                                                                                                                                                                                                                                                                                                                                                                                                                                                                                              |
| AT2G28400        |                                                       | Protein of unknown function, DUF584;                                                                                                                                                                                                                                                                                                                                                                                                                                                                                                                                                                                                                                                                                                                                                                                                                                                                                                                                                                                                                                                                                                                                                                                                                                                                                                   |
| AT2G29460        | GLUTATHIONE S-TRANSFERASE TAU 4 (GSTU4)               | Encodes glutathione transferase belonging to the tau class of GSTs. Naming convention according to Wagner et al. (2002).                                                                                                                                                                                                                                                                                                                                                                                                                                                                                                                                                                                                                                                                                                                                                                                                                                                                                                                                                                                                                                                                                                                                                                                                               |
| AT2G30040        | MITOGEN-ACTIVATED PROTEIN KINASE KINASE 14 (MAPKKK14) | member of MEKK subfamily                                                                                                                                                                                                                                                                                                                                                                                                                                                                                                                                                                                                                                                                                                                                                                                                                                                                                                                                                                                                                                                                                                                                                                                                                                                                                                               |
| AT2G30140        |                                                       | UDP-Glycosyltransferase superfamily protein                                                                                                                                                                                                                                                                                                                                                                                                                                                                                                                                                                                                                                                                                                                                                                                                                                                                                                                                                                                                                                                                                                                                                                                                                                                                                            |
| AT2G30930        |                                                       | unknown protein                                                                                                                                                                                                                                                                                                                                                                                                                                                                                                                                                                                                                                                                                                                                                                                                                                                                                                                                                                                                                                                                                                                                                                                                                                                                                                                        |
| AT2G33310        | AUXIN-INDUCED PROTEIN 13 (IAA13)                      | Auxin induced gene, IAA13 (IAA13).                                                                                                                                                                                                                                                                                                                                                                                                                                                                                                                                                                                                                                                                                                                                                                                                                                                                                                                                                                                                                                                                                                                                                                                                                                                                                                     |
| AT2G34650        | PINOID (PID)                                          | Encodes a protein serine/threonine kinase that may act as a positive regulator of cellular auxin efflux, as a binary switch for PIN polarity, and as a negative regulator of auxin signaling. Recessive mutants exhibit similar phenotypes as pin-formed mutants in flowers and inflorescence but distinct phenotypes in cotyledons and leaves. Expressed in the vascular tissue proximal to root and shoot meristems, shoot apex, and embryos. Expression is induced by auxin. Overexpression of the gene results in phenotypes in the root and shoot similar to those found in auxin-insensitive mutants. The protein physically interacts with TCH3 (TOUCH3) and PID-BINDING PROTEIN 1 (PBP1), a previously uncharacterized protein containing putative EF-hand calcium-binding motifs. Acts together with ENP (ENHANCER OF PINOID) to instruct precursor cells to elaborate cotyledons in the transition stage embryo. Interacts with PDK1. PID autophosphorylation is required for the ability of PID to phosphorylate an exogenous substrate. PID activation loop is required for PDK1-dependent PID phosphorylation and requires the PIF domain. Negative regulator of root hair growth. PID kinase activity is critical for the inhibition of root hair growth and for maintaining the proper subcellular localization of PID. |
| AT2G35930        | PLANT U-BOX 23 (PUB23)                                | Encodes a cytoplasmically localized U-box domain containing E3 ubiquitin ligase that is involved in the response to water stress and acts as a negative regulator of PAMP-triggered immunity.                                                                                                                                                                                                                                                                                                                                                                                                                                                                                                                                                                                                                                                                                                                                                                                                                                                                                                                                                                                                                                                                                                                                          |

| Locus identifier | Primary Gene Symbol                                                | Gene Model Description                                                                                                                                                                                                                                                                                                                                                                                                                                                                                                                                                                                                                                                                                                                                                                                                   |
|------------------|--------------------------------------------------------------------|--------------------------------------------------------------------------------------------------------------------------------------------------------------------------------------------------------------------------------------------------------------------------------------------------------------------------------------------------------------------------------------------------------------------------------------------------------------------------------------------------------------------------------------------------------------------------------------------------------------------------------------------------------------------------------------------------------------------------------------------------------------------------------------------------------------------------|
| AT2G35980        | YELLOW-LEAF-SPECIFIC GENE 9 (YLS9)                                 | Encodes a protein whose sequence is similar to tobacco hairpin-induced gene (HIN1) and Arabidopsis non-race specific disease resistance gene (NDR1). Expression of this gene is induced by cucumber mosaic virus, spermine and during senescence. The gene product is localized to the chloroplast.                                                                                                                                                                                                                                                                                                                                                                                                                                                                                                                      |
| AT2G36220        |                                                                    | unknown protein                                                                                                                                                                                                                                                                                                                                                                                                                                                                                                                                                                                                                                                                                                                                                                                                          |
| AT2G39350        | ATP-BINDING CASSETTE G1 (ABCG1)                                    | ABC-2 type transporter family protein                                                                                                                                                                                                                                                                                                                                                                                                                                                                                                                                                                                                                                                                                                                                                                                    |
| AT2G39370        |                                                                    | unknown protein;                                                                                                                                                                                                                                                                                                                                                                                                                                                                                                                                                                                                                                                                                                                                                                                                         |
| AT2G39700        | EXPANSIN A4 (EXPA4)                                                | putative expansin.                                                                                                                                                                                                                                                                                                                                                                                                                                                                                                                                                                                                                                                                                                                                                                                                       |
| AT2G40540        | POTASSIUM TRANSPORTER 2 (KT2)                                      | putative potassium transporter AtKT2p (AtKT2) mRNA.                                                                                                                                                                                                                                                                                                                                                                                                                                                                                                                                                                                                                                                                                                                                                                      |
| AT2G41100        | TOUCH 3 (TCH3)                                                     | encodes a calmodulin-like protein, with six potential calcium binding domains. Calcium binding shown by Ca(2+)-specific shift in electrophoretic mobility. Expression induced by touch and darkness. Expression may also be developmentally controlled. Expression in growing regions of roots, vascular tissue, root/shoot junctions, trichomes, branch points of the shoot, and regions of siliques and flowers.                                                                                                                                                                                                                                                                                                                                                                                                       |
| AT2G41380        |                                                                    | S-adenosyl-L-methionine-dependent methyltransferases superfamily protein;                                                                                                                                                                                                                                                                                                                                                                                                                                                                                                                                                                                                                                                                                                                                                |
| AT2G41810        |                                                                    | _ unknown                                                                                                                                                                                                                                                                                                                                                                                                                                                                                                                                                                                                                                                                                                                                                                                                                |
| AT2G42430        | LATERAL ORGAN BOUNDARIES-DOMAIN 16 (LBD16)                         | LOB-domain protein gene LBD16. This gene contains one auxin-responsive element (AuxRE).                                                                                                                                                                                                                                                                                                                                                                                                                                                                                                                                                                                                                                                                                                                                  |
| AT2G42440        |                                                                    | Lateral organ boundaries (LOB) domain family protein; CONTAINS InterPro DOMAIN/s: Lateral organ boundaries, LOB (InterPro:IPR004883)                                                                                                                                                                                                                                                                                                                                                                                                                                                                                                                                                                                                                                                                                     |
| AT2G42570        | TRICHOME BIREFRINGENCE-LIKE 39 (TBL39)                             | Encodes a member of the TBL (TRICHOME BIREFRINGENCE-LIKE) gene family containing a plant-specific DUF231 (domain of unknown function) domain. TBL gene family has 46 members, two of which (TBR/AT5G06700 and TBL3/AT5G01360) have been shown to be involved in the synthesis and deposition of secondary wall cellulose, presumably by influencing the esterification state of pectic polymers. A nomenclature for this gene family has been proposed (Volker Bischoff & Wolf Scheible, 2010, personal communication).                                                                                                                                                                                                                                                                                                  |
| AT2G42870        | PHY RAPIDLY REGULATED 1 (PAR1)                                     | Encodes PHYTOCHROME RAPIDLY REGULATED1 (PAR1), an atypical basic helix-loop-helix (bHLP) protein. Closely related to PAR2 (At3g58850). Up regulated after simulated shade perception. Acts in the nucleus to control plant development and as a negative regulator of shade avoidance response. Functions as transcriptional repressor of auxin-responsive genes SAUR15 (AT4G38850) and SAUR68 (AT1G29510).                                                                                                                                                                                                                                                                                                                                                                                                              |
| AT2G43290        | MULTICOPY SUPPRESSORS OF SNF4 DEFICIENCY IN YEAST 3 (MSS3)         | Encodes calmodulin-like MSS3.                                                                                                                                                                                                                                                                                                                                                                                                                                                                                                                                                                                                                                                                                                                                                                                            |
| AT2G43590        |                                                                    | Chitinase family protein                                                                                                                                                                                                                                                                                                                                                                                                                                                                                                                                                                                                                                                                                                                                                                                                 |
| AT2G43880        |                                                                    | Pectin lyase-like superfamily protein;                                                                                                                                                                                                                                                                                                                                                                                                                                                                                                                                                                                                                                                                                                                                                                                   |
| AT2G45400        | (BEN1)                                                             | involved in the regulation of brassinosteroid metabolic pathway                                                                                                                                                                                                                                                                                                                                                                                                                                                                                                                                                                                                                                                                                                                                                          |
| AT2G45420        | LOB DOMAIN-CONTAINING PROTEIN 18 (LBD18)                           | LOB domain-containing protein 18 (LBD18)                                                                                                                                                                                                                                                                                                                                                                                                                                                                                                                                                                                                                                                                                                                                                                                 |
| AT2G47130        |                                                                    | NAD(P)-binding Rossmann-fold superfamily protein                                                                                                                                                                                                                                                                                                                                                                                                                                                                                                                                                                                                                                                                                                                                                                         |
| AT2G47140        |                                                                    | NAD(P)-binding Rossmann-fold superfamily protein                                                                                                                                                                                                                                                                                                                                                                                                                                                                                                                                                                                                                                                                                                                                                                         |
| AT2G47260        | WRKY DNA-BINDING PROTEIN 23 (WRKY23)                               | Encodes a member of WRKY Transcription Factor; Group I. Involved in nematode feeding site establishment.                                                                                                                                                                                                                                                                                                                                                                                                                                                                                                                                                                                                                                                                                                                 |
| AT2G47440        |                                                                    | Tetratricopeptide repeat (TPR)-like superfamily protein Eukaryotes - 33 (source: NCBI BLINK).                                                                                                                                                                                                                                                                                                                                                                                                                                                                                                                                                                                                                                                                                                                            |
| AT3G01190        |                                                                    | Peroxidase superfamily protein                                                                                                                                                                                                                                                                                                                                                                                                                                                                                                                                                                                                                                                                                                                                                                                           |
| AT3G02850        | STELAR K+ OUTWARD RECTIFIER (SKOR)                                 | Encodes SKOR, a member of Shaker family potassium ion (K+) channel. This family includes five groups based on phylogenetic analysis (FEBS Letters (2007) 581: 2357): I (inward rectifying channel): AKT1 (AT2G26650), AKT5 (AT4G32500) and SPIK (also known as AKT6, AT2G25600); II (inward rectifying channel): KAT1 (AT5G46240) and KAT2 (AT4G18290); III (weakly inward rectifying channel): AKT2 (AT4G22200); IV (regulatory subunit involved in inwardly rectifying conductance formation): KAT3 (also known as AtKC1, AT4G32650); V (outward rectifying channel): SKOR (AT3G02850) and GORK (AT5G37500). Mediates the delivery of K+ from stellar cells to the xylem in the roots towards the shoot. mRNA accumulation is modulated by abscisic acid. K+ gating activity is modulated by external and internal K+. |
| AT3G02885        | GAST1 PROTEIN HOMOLOG 5 (GASA5)                                    | GAST1 protein homolog 5 (GASA5); INVOLVED IN: response to gibberellin stimulus;                                                                                                                                                                                                                                                                                                                                                                                                                                                                                                                                                                                                                                                                                                                                          |
| AT3G06460        |                                                                    | GNS1/SUR4 membrane protein family;                                                                                                                                                                                                                                                                                                                                                                                                                                                                                                                                                                                                                                                                                                                                                                                       |
| AT3G07010        |                                                                    | Pectin lyase-like superfamily protein                                                                                                                                                                                                                                                                                                                                                                                                                                                                                                                                                                                                                                                                                                                                                                                    |
| AT3G07390        | AUXIN-INDUCED IN ROOT CULTURES 12 (AIR12)                          | isolated from differential screening of a cDNA library from auxin-treated root culture. sequence does not show homology to any known proteins and is predicted to be extracellular.                                                                                                                                                                                                                                                                                                                                                                                                                                                                                                                                                                                                                                      |
| AT3G09280        |                                                                    | unknown protein                                                                                                                                                                                                                                                                                                                                                                                                                                                                                                                                                                                                                                                                                                                                                                                                          |
| AT3G12700        |                                                                    | Eukaryotic aspartyl protease family protein;                                                                                                                                                                                                                                                                                                                                                                                                                                                                                                                                                                                                                                                                                                                                                                             |
| AT3G13380        | BRI1-LIKE 3 (BRL3)                                                 | Similar to BRI, brassinosteroid receptor protein.                                                                                                                                                                                                                                                                                                                                                                                                                                                                                                                                                                                                                                                                                                                                                                        |
| AT3G14690        | CYTOCHROME P450, FAMILY 72, SUBFAMILY A, POLYPEPTIDE 15 (CYP72A15) | putative cytochrome P450                                                                                                                                                                                                                                                                                                                                                                                                                                                                                                                                                                                                                                                                                                                                                                                                 |
| AT3G15540        | INDOLE-3-ACETIC ACID INDUCIBLE 19 (IAA19)                          | Primary auxin-responsive gene. Involved in the regulation stamen filaments development.                                                                                                                                                                                                                                                                                                                                                                                                                                                                                                                                                                                                                                                                                                                                  |
| AT3G16180        |                                                                    | Major facilitator superfamily protein                                                                                                                                                                                                                                                                                                                                                                                                                                                                                                                                                                                                                                                                                                                                                                                    |
| AT3G16570        | RAPID ALKALINIZATION FACTOR 23 (RALF23)                            | Encodes RALF23, a member of a diversely expressed predicted peptide family showing sequence similarity to tobacco Rapid Alkalinization Factor (RALF), and is believed to play an essential role in the physiology of Arabidopsis. Consists of a single exon and is characterized by a conserved C-terminal motif and N-terminal signal peptide. RALF23 is significantly downregulated by brassinolide treatment of seedlings. Overexpression of AtRALF23 impairs brassinolide-induced hypocotyls elongation, and mature overexpressing plants are shorter and bushier. RALF23 overexpression produces slower growing seedlings with roots that have reduced capacity to acidify the rhizosphere.                                                                                                                         |
| AT3G18280        |                                                                    | Bifunctional inhibitor/lipid-transfer protein/seed storage 2S albumin superfamily protein;                                                                                                                                                                                                                                                                                                                                                                                                                                                                                                                                                                                                                                                                                                                               |
| AT3G18560        |                                                                    | unknown protein;                                                                                                                                                                                                                                                                                                                                                                                                                                                                                                                                                                                                                                                                                                                                                                                                         |
| AT3G19200        |                                                                    | unknown protein;                                                                                                                                                                                                                                                                                                                                                                                                                                                                                                                                                                                                                                                                                                                                                                                                         |
| AT3G19320        |                                                                    | Leucine-rich repeat (LRR) family protein                                                                                                                                                                                                                                                                                                                                                                                                                                                                                                                                                                                                                                                                                                                                                                                 |
| AT3G20015        |                                                                    | Eukaryotic aspartyl protease family protein                                                                                                                                                                                                                                                                                                                                                                                                                                                                                                                                                                                                                                                                                                                                                                              |
| AT3G20830        |                                                                    | AGC (cAMP-dependent, cGMP-dependent and protein kinase C) kinase family protein;                                                                                                                                                                                                                                                                                                                                                                                                                                                                                                                                                                                                                                                                                                                                         |
| AT3G21250        | ATP-BINDING CASSETTE C8 (ABCC8)                                    | member of MRP subfamily                                                                                                                                                                                                                                                                                                                                                                                                                                                                                                                                                                                                                                                                                                                                                                                                  |
| AT3G21700        | (SGP2)                                                             | Monomeric G protein. Expressed in root epidermal cells that are destined to become atrichoblasts. Also expressed during pollen development and in the pollen tube tip.                                                                                                                                                                                                                                                                                                                                                                                                                                                                                                                                                                                                                                                   |
| AT3G23030        | INDOLE-3-ACETIC ACID INDUCIBLE 2 (IAA2)                            | auxin inducible gene expressed in the nucleus                                                                                                                                                                                                                                                                                                                                                                                                                                                                                                                                                                                                                                                                                                                                                                            |
| AT3G23730        | XYLOGLUCAN ENDOTRANSGLUCOSYLASE/HYDROLASE 16 (XTH16)               | xyloglucan endotransglucosylase/hydrolase 16 (XTH16); FUNCTIONS IN: hydrolase activity, acting on glycosyl bonds, hydrolase activity, hydrolyzing O-glycosyl compounds, xyloglucan:xyloglucosyl transferase activity; INVOLVED IN: carbohydrate metabolic process, cellular glucan metabolic process                                                                                                                                                                                                                                                                                                                                                                                                                                                                                                                     |
| AT3G24750        |                                                                    | unknown protein                                                                                                                                                                                                                                                                                                                                                                                                                                                                                                                                                                                                                                                                                                                                                                                                          |
| AT3G26610        |                                                                    | Pectin lyase-like superfamily protein                                                                                                                                                                                                                                                                                                                                                                                                                                                                                                                                                                                                                                                                                                                                                                                    |

| Locus identifier | Primary Gene Symbol                                              | Gene Model Description                                                                                                                                                                                                                                                                                                                                                                                                                                                                                                                                                                                                                                                                                                         |
|------------------|------------------------------------------------------------------|--------------------------------------------------------------------------------------------------------------------------------------------------------------------------------------------------------------------------------------------------------------------------------------------------------------------------------------------------------------------------------------------------------------------------------------------------------------------------------------------------------------------------------------------------------------------------------------------------------------------------------------------------------------------------------------------------------------------------------|
| AT3G26760        |                                                                  | NAD(P)-binding Rossmann-fold superfamily protein                                                                                                                                                                                                                                                                                                                                                                                                                                                                                                                                                                                                                                                                               |
| AT3G28850        |                                                                  | Glutaredoxin family protein                                                                                                                                                                                                                                                                                                                                                                                                                                                                                                                                                                                                                                                                                                    |
| AT3G42800        |                                                                  | unknown protein                                                                                                                                                                                                                                                                                                                                                                                                                                                                                                                                                                                                                                                                                                                |
| AT3G43800        | GLUTATHIONE S-TRANSFERASE TAU 27 (GSTU27)                        | Encodes glutathione transferase belonging to the tau class of GSTs. Naming convention according to Wagner et al. (2002).                                                                                                                                                                                                                                                                                                                                                                                                                                                                                                                                                                                                       |
| AT3G44990        | XYLOGLUCAN ENDO-TRANSGLYCOSYLASE-RELATED 8 (XTR8)                | xyloglucan endo-transglycosylase                                                                                                                                                                                                                                                                                                                                                                                                                                                                                                                                                                                                                                                                                               |
| AT3G48520        | CYTOCHROME P450, FAMILY 94, SUBFAMILY B, POLYPEPTIDE 3 (CYP94B3) | CYP94B3 is a jasmonoyl-isoleucine-12-hydroxylase that catalyzes the formation of 12-OH-JA-Ile from JA-Ile. By reducing the levels of this the biologically active phytohormone, CYP94B3 attenuates the jasmonic acid signaling cascade. CYP94B3 transcript levels rise in response to wounding.                                                                                                                                                                                                                                                                                                                                                                                                                                |
| AT3G49350        |                                                                  | Ypt/Rab-GAP domain of gyp1p superfamily protein                                                                                                                                                                                                                                                                                                                                                                                                                                                                                                                                                                                                                                                                                |
| AT3G49360        | 6-PHOSPHOGLUCONOLACTONASE 2 (PGL2)                               | 6-phosphogluconolactonase 2 (PGL2)                                                                                                                                                                                                                                                                                                                                                                                                                                                                                                                                                                                                                                                                                             |
| AT3G49700        | 1-AMINOCYCLOPROPANE-1-CARBOXYLATE SYNTHASE 9 (ACS9)              | encodes a member of the 1-aminocyclopropane-1-carboxylate (ACC) synthase (S-adenosyl-L-methionine methylthioadenosine-lyase, EC 4.4.1.14) gene family. Mutants produce elevated levels of ethylene as etiolated seedlings.                                                                                                                                                                                                                                                                                                                                                                                                                                                                                                     |
| AT3G50660        | DWARF 4 (DWF4)                                                   | Encodes a 22kD#945; hydroxylase whose reaction is a rate-limiting step in brassinosteroid biosynthetic pathway. The protein is a member of CYP90B gene family. CLM is an epi-allele with small, compressed rosette, reduced internode length, and reduced fertility, appears in selfed ddm mutant plants possibly due to loss of cytosine methylation. Transcripts accumulate in actively growing tissues, and GUS expression is negatively regulated by brassinosteroids. Localized in the endoplasmic reticulum. The in vitro expressed protein can perform the C-22 hydroxylation of a variety of C27-, C28- and C29-sterols. Cholesterol was the best substrate, followed by campesterol. Sitosterol was a poor substrate. |
| AT3G51410        |                                                                  | Arabidopsis protein of unknown function (DUF241)                                                                                                                                                                                                                                                                                                                                                                                                                                                                                                                                                                                                                                                                               |
| AT3G51670        | PATL6                                                            | SEC14 cytosolic factor family protein / phosphoglyceride transfer family protein                                                                                                                                                                                                                                                                                                                                                                                                                                                                                                                                                                                                                                               |
| AT3G54000        |                                                                  | Uncharacterised conserved protein UCP022260                                                                                                                                                                                                                                                                                                                                                                                                                                                                                                                                                                                                                                                                                    |
| AT3G54770        |                                                                  | RNA-binding (RRM/RBD/RNP motifs) family protein                                                                                                                                                                                                                                                                                                                                                                                                                                                                                                                                                                                                                                                                                |
| AT3G54950        | PATATIN-RELATED PHOSPHOLIPASE IIIBETA (pPLAIIIBeta)              | Encodes pPLAIIIBeta, a member of the Group 3 patatin-related phospholipases. pPLAIIIBeta hydrolyzes phospholipids and galactolipids and additionally has acyl-CoA thioesterase activity. Alterations of pPLAIIIBeta result in changes in lipid levels and composition.                                                                                                                                                                                                                                                                                                                                                                                                                                                         |
| AT3G55690        |                                                                  | unknown protein;                                                                                                                                                                                                                                                                                                                                                                                                                                                                                                                                                                                                                                                                                                               |
| AT3G55720        |                                                                  | Protein of unknown function (DUF620)                                                                                                                                                                                                                                                                                                                                                                                                                                                                                                                                                                                                                                                                                           |
| AT3G56230        |                                                                  | BTB/POZ domain-containing protein                                                                                                                                                                                                                                                                                                                                                                                                                                                                                                                                                                                                                                                                                              |
| AT3G56880        |                                                                  | VQ motif-containing protein                                                                                                                                                                                                                                                                                                                                                                                                                                                                                                                                                                                                                                                                                                    |
| AT3G58190        | LATERAL ORGAN BOUNDARIES-DOMAIN 29 (LBD29)                       | This gene contains two auxin-responsive element (AuxRE).                                                                                                                                                                                                                                                                                                                                                                                                                                                                                                                                                                                                                                                                       |
| AT3G60550        | CYCLIN P3;2 (CYCP3;2)                                            | cyclin p3;2 (CYCP3;2);                                                                                                                                                                                                                                                                                                                                                                                                                                                                                                                                                                                                                                                                                                         |
| AT3G60630        | HAIRY MERISTEM 2 (HAM2)                                          | Belongs to one of the LOM (LOST MERISTEMS) genes: AT2G45160 (LOM1), AT3G60630 (LOM2) and AT4G00150 (LOM3). LOM1 and LOM2 promote cell differentiation at the periphery of shoot meristems and help to maintain their polar organization.                                                                                                                                                                                                                                                                                                                                                                                                                                                                                       |
| AT3G60640        | AUTOPHAGY 8G (ATG8G)                                             | AUTOPHAGY 8G (ATG8G)                                                                                                                                                                                                                                                                                                                                                                                                                                                                                                                                                                                                                                                                                                           |
| AT3G61490        |                                                                  | Pectin lyase-like superfamily protein;                                                                                                                                                                                                                                                                                                                                                                                                                                                                                                                                                                                                                                                                                         |
| AT3G62100        | INDOLE-3-ACETIC ACID INDUCIBLE 30 (IAA30)                        | Encodes a member of the Aux/IAA family of proteins implicated in auxin signaling. IAA30 lacks the conserved degron (domain II) found in many family members. IAA30 transcripts are induced by auxin treatment and accumulate preferentially in the quiescent center cells of the root meristem. Overexpression of IAA30 leads to defects in gravitropism, root development, root meristem maintenance, and cotyledon vascular development. Target of LEC2 and AGL15. Promotes somatic embryogenesis.                                                                                                                                                                                                                           |
| AT3G63440        | CYTOKININ OXIDASE/DEHYDROGENASE 6 (CKX6)                         | This gene used to be called AtCKX7. It encodes a protein whose sequence is similar to cytokinin oxidase/dehydrogenase, which catalyzes the degradation of cytokinins.                                                                                                                                                                                                                                                                                                                                                                                                                                                                                                                                                          |
| AT4G00080        | UNFERTILIZED EMBRYO SAC 11 (UNE11)                               | unfertilized embryo sac 11 (UNE11)                                                                                                                                                                                                                                                                                                                                                                                                                                                                                                                                                                                                                                                                                             |
| AT4G01870        |                                                                  | tolB protein-related                                                                                                                                                                                                                                                                                                                                                                                                                                                                                                                                                                                                                                                                                                           |
| AT4G03820        |                                                                  | Protein of unknown function (DUF3537)                                                                                                                                                                                                                                                                                                                                                                                                                                                                                                                                                                                                                                                                                          |
| AT4G08040        | 1-AMINOCYCLOPROPANE-1-CARBOXYLATE SYNTHASE 11 (ACS11)            | encodes an aminotransferase that belongs to ACC synthase gene family structurally                                                                                                                                                                                                                                                                                                                                                                                                                                                                                                                                                                                                                                              |
| AT4G09570        | CALCIUM-DEPENDENT PROTEIN KINASE 4 (CPK4)                        | Encodes a member of Calcium Dependent Protein Kinase (CDPK) gene family. Positive regulator of ABA signaling. Phosphorylates ABA responsive transcription factors ABF1 and ABF4.                                                                                                                                                                                                                                                                                                                                                                                                                                                                                                                                               |
| AT4G11280        | 1-AMINOCYCLOPROPANE-1-CARBOXYLIC ACID (ACC) SYNTHASE 6 (ACS6)    | encodes a member of the 1-aminocyclopropane-1-carboxylate (ACC) synthase (S-adenosyl-L-methionine methylthioadenosine-lyase, EC 4.4.1.14) gene family                                                                                                                                                                                                                                                                                                                                                                                                                                                                                                                                                                          |
| AT4G12110        | STEROL-4ALPHA-METHYL OXIDASE 1-1 (SMO1-1)                        | Encodes a member of the SMO1 family of sterol 4alpha-methyl oxidases. More specifically functions as a 4,4-dimethyl-9beta,19-cyclopropylsterol-4alpha-methyl oxidase.                                                                                                                                                                                                                                                                                                                                                                                                                                                                                                                                                          |
| AT4G12410        |                                                                  | SAUR-like auxin-responsive protein family; CONTAINS InterPro DOMAIN/s: Auxin responsive SAUR protein (InterPro:IPR003676); BEST Arabidopsis thaliana protein match is: SAUR-like auxin-responsive protein family (TAIR:AT4G22620.1); Has 1137 Blast hits to 1128 proteins in 26 species: Archaea - 0; Bacteria - 0; Metazoa - 0; Fungi - 0; Plants - 1136; Viruses - 0; Other Eukaryotes - 1 (source: NCBI BLINK).                                                                                                                                                                                                                                                                                                             |
| AT4G12720        | (NUDT7)                                                          | Encodes a protein with ADP-ribose hydrolase activity. Negatively regulates EDS1-conditioned plant defense and programmed cell death.                                                                                                                                                                                                                                                                                                                                                                                                                                                                                                                                                                                           |
| AT4G12730        | FASCICLIN-LIKE ARABINOGALACTAN 2 (FLA2)                          | AF333971 Arabidopsis thaliana fasciclin-like arabinogalactan-protein 2 (Fla2) mRNA, complete cds                                                                                                                                                                                                                                                                                                                                                                                                                                                                                                                                                                                                                               |
| AT4G12880        | EARLY NODULIN-LIKE PROTEIN 19 (ENODL19)                          | early nodulin-like protein 19 (ENODL19)                                                                                                                                                                                                                                                                                                                                                                                                                                                                                                                                                                                                                                                                                        |
| AT4G13180        |                                                                  | NAD(P)-binding Rossmann-fold superfamily protein).                                                                                                                                                                                                                                                                                                                                                                                                                                                                                                                                                                                                                                                                             |
| AT4G13195        | CLAVATA3/ESR-RELATED 44 (CLE44)                                  | Belongs to a large gene family, called CLE for CLAVATA3/ESR-related, encoding small peptides with conserved carboxyl termini. The C-terminal 12 amino acid sequence of CLE44 is identical to that of a decode peptide (TDIF, tracheary element differentiation inhibitory factor) isolated from Arabidopsis and functions as a suppressor of plant stem cell differentiation. TDIF sequence is also identical to the C-terminal 12 amino acids of CLE41 (At3g24770).                                                                                                                                                                                                                                                           |
| AT4G14130        | XYLOGLUCAN ENDOTRANSGLUCOSYLASE E/HYDROLASE 15 (XTH15)           | xyloglucan endotransglycosylase-related protein (XTR7)                                                                                                                                                                                                                                                                                                                                                                                                                                                                                                                                                                                                                                                                         |
| AT4G14560        | INDOLE-3-ACETIC ACID INDUCIBLE (IAA1)                            | auxin (indole-3-acetic acid) induced gene (IAA1) encoding a short-lived nuclear-localized transcriptional regulator protein.                                                                                                                                                                                                                                                                                                                                                                                                                                                                                                                                                                                                   |

| Locus identifier | Primary Gene Symbol                                 | Gene Model Description                                                                                                                                                                                                                                                                                                                                                                                                                                                                                                                                                                                                                          |
|------------------|-----------------------------------------------------|-------------------------------------------------------------------------------------------------------------------------------------------------------------------------------------------------------------------------------------------------------------------------------------------------------------------------------------------------------------------------------------------------------------------------------------------------------------------------------------------------------------------------------------------------------------------------------------------------------------------------------------------------|
| AT4G14750        | IQ-DOMAIN 19 (IQD19)                                | IQ-domain 19 (IQD19); CONTAINS InterPro DOMAIN/s: IQ calmodulin-binding region (InterPro:IPR000048)                                                                                                                                                                                                                                                                                                                                                                                                                                                                                                                                             |
| AT4G17350        |                                                     | DOMAIN/s: Pleckstrin-like, plant (InterPro:IPR013666), Protein of unknown function DUF828 (InterPro:IPR008546), Pleckstrin homology (InterPro:IPR001849)                                                                                                                                                                                                                                                                                                                                                                                                                                                                                        |
| AT4G17490        | ETHYLENE RESPONSIVE ELEMENT BINDING FACTOR 6 (ERF6) | Encodes a member of the ERF (ethylene response factor) subfamily B-3 of ERF/AP2 transcription factor family (ATERF-6). The protein contains one AP2 domain. There are 18 members in this subfamily including ATERF-1, ATERF-2, AND ATERF-5.                                                                                                                                                                                                                                                                                                                                                                                                     |
| AT4G17870        | PYRABACTIN RESISTANCE 1 (PYR1)                      | Encodes a member of the PYR (pyrabactin resistance )/PYL(PYR1-like)/RCAR (regulatory components of ABA receptor) family proteins with 14 members. PYR/PYL/RCAR family proteins function as abscisic acid sensors. Mediate ABA-dependent regulation of protein phosphatase 2Cs ABI1 and ABI2.                                                                                                                                                                                                                                                                                                                                                    |
| AT4G20460        |                                                     | NAD(P)-binding Rossmann-fold superfamily protein                                                                                                                                                                                                                                                                                                                                                                                                                                                                                                                                                                                                |
| AT4G21200        | GIBBERELLIN 2-OXIDASE 8 (GA2OX8)                    | Encodes a protein with gibberellin 2-oxidase activity which acts specifically on C-20 gibberellins.                                                                                                                                                                                                                                                                                                                                                                                                                                                                                                                                             |
| AT4G21850        | METHIONINE SULFOXIDE REDUCTASE B9 (MSRB9)           | methionine sulfoxide reductase B9 (MSRB9);                                                                                                                                                                                                                                                                                                                                                                                                                                                                                                                                                                                                      |
| AT4G21870        |                                                     | HSP20-like chaperones superfamily protein                                                                                                                                                                                                                                                                                                                                                                                                                                                                                                                                                                                                       |
| AT4G22530        |                                                     | S-adenosyl-L-methionine-dependent methyltransferases superfamily protein                                                                                                                                                                                                                                                                                                                                                                                                                                                                                                                                                                        |
| AT4G22620        |                                                     | SAUR-like auxin-responsive protein family                                                                                                                                                                                                                                                                                                                                                                                                                                                                                                                                                                                                       |
| AT4G22780        | ACT DOMAIN REPEAT 7 (ACR7)                          | Member of a family of ACT domain containing proteins . ACT domains are involved in amino acid binding .                                                                                                                                                                                                                                                                                                                                                                                                                                                                                                                                         |
| AT4G24160        |                                                     | Encodes a soluble lysophosphatidic acid acyltransferase with additional triacylglycerol lipase and phosphatidylcholine hydrolyzing enzymatic activities. Plays a pivotal role in maintaining the lipid homeostasis by regulating both phospholipid and neutral lipid levels.                                                                                                                                                                                                                                                                                                                                                                    |
| AT4G25250        |                                                     | Plant invertase/pectin methyltransferase inhibitor superfamily protein                                                                                                                                                                                                                                                                                                                                                                                                                                                                                                                                                                          |
| AT4G26320        | ARABINOGLACTAN PROTEIN 13 (AGP13)                   | arabinogalactan protein 13 (AGP13);                                                                                                                                                                                                                                                                                                                                                                                                                                                                                                                                                                                                             |
| AT4G27260        | (WES1)                                              | encodes an IAA-amido synthase that conjugates Asp and other amino acids to auxin in vitro. Lines carrying insertions in this gene are hypersensitive to auxin.                                                                                                                                                                                                                                                                                                                                                                                                                                                                                  |
| AT4G27280        |                                                     | Calcium-binding EF-hand family protein;                                                                                                                                                                                                                                                                                                                                                                                                                                                                                                                                                                                                         |
| AT4G27290        |                                                     | S-locus lectin protein kinase family protein                                                                                                                                                                                                                                                                                                                                                                                                                                                                                                                                                                                                    |
| AT4G28640        | INDOLE-3-ACETIC ACID INDUCIBLE 11 (IAA11)           | Auxin induced gene, IAA11 (IAA11).                                                                                                                                                                                                                                                                                                                                                                                                                                                                                                                                                                                                              |
| AT4G29900        | AUTOINHIBITED CA(2+)-ATPASE 10 (ACA10)              | one of the type IIB calcium pump isoforms. encodes an autoinhibited Ca(2+)-ATPase that contains an N-terminal calmodulin binding autoinhibitory domain.                                                                                                                                                                                                                                                                                                                                                                                                                                                                                         |
| AT4G30170        |                                                     | Peroxidase family protein                                                                                                                                                                                                                                                                                                                                                                                                                                                                                                                                                                                                                       |
| AT4G30420        |                                                     | nodulin MtN21 /EamA-like transporter family protein                                                                                                                                                                                                                                                                                                                                                                                                                                                                                                                                                                                             |
| AT4G30450        |                                                     | glycine-rich protein                                                                                                                                                                                                                                                                                                                                                                                                                                                                                                                                                                                                                            |
| AT4G31320        |                                                     | SAUR-like auxin-responsive protein family                                                                                                                                                                                                                                                                                                                                                                                                                                                                                                                                                                                                       |
| AT4G31910        |                                                     | HXXXD-type acyl-transferase family protein                                                                                                                                                                                                                                                                                                                                                                                                                                                                                                                                                                                                      |
| AT4G32280        | INDOLE-3-ACETIC ACID INDUCIBLE 29 (IAA29)           | Auxin inducible protein.                                                                                                                                                                                                                                                                                                                                                                                                                                                                                                                                                                                                                        |
| AT4G34150        |                                                     | Calcium-dependent lipid-binding (CaLB domain) family protein;                                                                                                                                                                                                                                                                                                                                                                                                                                                                                                                                                                                   |
| AT4G34710        | ARGININE DECARBOXYLASE 2 (ADC2)                     | encodes a arginine decarboxylase (ADC), a rate-limiting enzyme that catalyzes the first step of polyamine (PA) biosynthesis via ADC pathway in Arabidopsis thaliana. Arabidopsis genome has two ADC paralogs, ADC1 and ADC2. ADC2 is stress-inducible (osmotic stress). Double mutant analysis showed that ADC genes are essential for the production of PA, and are required for normal seed development. Overexpression causes phenotypes similar to GA-deficient plants and these plants show reduced levels of GA due to lower expression levels of AtGA20ox1, AtGA3ox3 and AtGA3ox1.                                                       |
| AT4G35210        |                                                     | Arabidopsis protein of unknown function (DUF241);                                                                                                                                                                                                                                                                                                                                                                                                                                                                                                                                                                                               |
| AT4G35320        |                                                     | unknown protein                                                                                                                                                                                                                                                                                                                                                                                                                                                                                                                                                                                                                                 |
| AT4G37290        |                                                     | unknown protein                                                                                                                                                                                                                                                                                                                                                                                                                                                                                                                                                                                                                                 |
| AT4G37295        |                                                     | unknown protein                                                                                                                                                                                                                                                                                                                                                                                                                                                                                                                                                                                                                                 |
| AT4G37590        | NAKED PINS IN YUC MUTANTS 5 (NPY5)                  | A member of the NPY gene family (NPY1/AT4G31820, NPY2/AT2G14820, NPY3/AT5G67440, NPY4/AT2G23050, NPY5/AT4G37590). Involved in auxin-mediated organogenesis.                                                                                                                                                                                                                                                                                                                                                                                                                                                                                     |
| AT5G01750        |                                                     | Protein of unknown function (DUF567)                                                                                                                                                                                                                                                                                                                                                                                                                                                                                                                                                                                                            |
| AT5G01840        | OVATE FAMILY PROTEIN 1 (OPF1)                       | Encodes a member of the plant specific ovate protein family. Members of this family have been shown to bind to KNOX and BELL-like TALE class homeodomain proteins. This interaction may mediate relocalization of the TALE homeodomain from the nucleus to the cytoplasm. Functions as a transcriptional repressor that suppresses cell elongation.                                                                                                                                                                                                                                                                                             |
| AT5G02760        |                                                     | Protein phosphatase 2C family protein                                                                                                                                                                                                                                                                                                                                                                                                                                                                                                                                                                                                           |
| AT5G03960        | IQ-DOMAIN 12 (IQD12)                                | IQ-domain 12 (IQD12)                                                                                                                                                                                                                                                                                                                                                                                                                                                                                                                                                                                                                            |
| AT5G04980        |                                                     | DNase I-like superfamily protein                                                                                                                                                                                                                                                                                                                                                                                                                                                                                                                                                                                                                |
| AT5G05160        | REDUCED IN LATERAL GROWTH1 (RUL1)                   | Encodes a receptor-like kinase that activates secondary growth, the production of secondary vascular tissues.                                                                                                                                                                                                                                                                                                                                                                                                                                                                                                                                   |
| AT5G06080        | LOB DOMAIN-CONTAINING PROTEIN 33 (LBD33)            | LOB domain-containing protein 33 (LBD33)                                                                                                                                                                                                                                                                                                                                                                                                                                                                                                                                                                                                        |
| AT5G10210        |                                                     | C2 calcium-dependent membrane targeting                                                                                                                                                                                                                                                                                                                                                                                                                                                                                                                                                                                                         |
| AT5G10430        | ARABINOGLACTAN PROTEIN 4 (AGP4)                     | Encodes arabinogalactan-protein (AGP4).                                                                                                                                                                                                                                                                                                                                                                                                                                                                                                                                                                                                         |
| AT5G12050        |                                                     | unknown protein;                                                                                                                                                                                                                                                                                                                                                                                                                                                                                                                                                                                                                                |
| AT5G13910        | LEAFY PETIOLE (LEP)                                 | Encodes a member of the ERF (ethylene response factor) subfamily B-1 of ERF/AP2 transcription factor family (LEAFY PETIOLE). The protein contains one AP2 domain. There are 15 members in this subfamily including ATERF-3, ATERF-4, ATERF-7, and LEAFY PETIOLE. Acts as a positive regulator of gibberellic acid-induced germination.                                                                                                                                                                                                                                                                                                          |
| AT5G15890        | TRICHOME BIREFRINGENCE-LIKE 21 (TBL21)              | Encodes a member of the TBL (TRICHOME BIREFRINGENCE-LIKE) gene family containing a plant-specific DUF231 (domain of unknown function) domain. TBL gene family has 46 members, two of which (TBR/AT5G06700 and TBL3/AT5G01360) have been shown to be involved in the synthesis and deposition of secondary wall cellulose, presumably by influencing the esterification state of pectic polymers. A nomenclature for this gene family has been proposed (Volker Bischoff & Wolf Scheible, 2010, personal communication).                                                                                                                         |
| AT5G16110        |                                                     | unknown protein                                                                                                                                                                                                                                                                                                                                                                                                                                                                                                                                                                                                                                 |
| AT5G16120        |                                                     | alpha/beta-Hydrolases superfamily protein                                                                                                                                                                                                                                                                                                                                                                                                                                                                                                                                                                                                       |
| AT5G17340        |                                                     | Putative membrane lipoprotein                                                                                                                                                                                                                                                                                                                                                                                                                                                                                                                                                                                                                   |
| AT5G18560        | (PUCHI)                                             | Encodes PUCHI, a member of the ERF (ethylene response factor) subfamily B-1 of ERF/AP2 transcription factor family. The protein contains one AP2 domain. There are 15 members in this subfamily including ATERF-3, ATERF-4, ATERF-7, and leafy petiole. PUCHI is required for morphogenesis in the early lateral root primordium of Arabidopsis. Expressed in early floral meristem (stage 1 to 2). Required for early floral meristem growth and for bract suppression. Triple mutant with bop1 and bop2 displays a strong defect in the determination of floral meristem identity with reduced LFY expression and the lack of AP1 expression. |
| AT5G19530        | ACAULIS 5 (ACL5)                                    | Encodes a spermine synthase. Required for internode elongation and vascular development, specifically in the mechanism that defines the boundaries between veins and nonvein regions. This mechanism may be mediated by polar auxin transport. Though ACL5 has been shown to function as a spermine synthase in E. coli, an ACL5 knockout has no effect on the endogenous levels of free and conjugated polyamines in Arabidopsis, suggesting that ACL5 may have a very specific or altogether different in vivo function.                                                                                                                      |

| Locus identifier | Primary Gene Symbol                            | Gene Model Description                                                                                                                                                                                                                                                                                                                                              |
|------------------|------------------------------------------------|---------------------------------------------------------------------------------------------------------------------------------------------------------------------------------------------------------------------------------------------------------------------------------------------------------------------------------------------------------------------|
| AT5G20230        | BLUE-COPPER-BINDING PROTEIN (BCB)              | Al-stress-induced gene                                                                                                                                                                                                                                                                                                                                              |
| AT5G24100        |                                                | Leucine-rich repeat protein kinase family protein                                                                                                                                                                                                                                                                                                                   |
| AT5G26930        | GATA TRANSCRIPTION FACTOR 23 (GATA23)          | Encodes a member of the GATA factor family of zinc finger transcription factors. Controls lateral root founder cell specification.                                                                                                                                                                                                                                  |
| AT5G27000        | KINESIN 4 (ATK4)                               | Encodes a kinesin-like protein that binds microtubules in an ATP-dependent manner.                                                                                                                                                                                                                                                                                  |
| AT5G39670        |                                                | Calcium-binding EF-hand family protein;                                                                                                                                                                                                                                                                                                                             |
| AT5G40540        |                                                | Protein kinase superfamily protein                                                                                                                                                                                                                                                                                                                                  |
| AT5G42050        |                                                | DCD (Development and Cell Death) domain protein                                                                                                                                                                                                                                                                                                                     |
| AT5G43700        | AUXIN INDUCIBLE 2-11 (ATAUX2-11)               | Auxin inducible protein similar to transcription factors.                                                                                                                                                                                                                                                                                                           |
| AT5G47250        |                                                | LRR and NB-ARC domains-containing disease resistance protein;                                                                                                                                                                                                                                                                                                       |
| AT5G47370        | (HAT2)                                         | homeobox-leucine zipper genes induced by auxin, but not by other phytohormones. Plays opposite roles in the shoot and root tissues in regulating auxin-mediated morphogenesis.                                                                                                                                                                                      |
| AT5G47440        |                                                | CONTAINS InterPro DOMAIN/s: Pleckstrin-like, plant (InterPro:IPR013666), Protein of unknown function DUF828 (InterPro:IPR008546), Pleckstrin homology (InterPro:IPR001849)                                                                                                                                                                                          |
| AT5G48150        | PHYTOCHROME A SIGNAL TRANSDUCTION 1 (PAT1)     | Member of GRAS gene family. Semi-dominant mutant has a reduced response to far-red light and appears to act early in the phytochrome A signaling pathway.                                                                                                                                                                                                           |
| AT5G49360        | BETA-XYLOSIDASE 1 (BXL1)                       | Encodes a bifunctional [beta]-D-xylosidase/[alpha]-L-arabinofuranosidase required for pectic arabinan modification. Located in the extracellular matrix. Gene is expressed specifically in tissues undergoing secondary wall thickening. This is a member of glycosyl hydrolase family 3 and has six other closely related members.                                 |
| AT5G49450        | BASIC LEUCINE-ZIPPER 1 (bZIP1)                 | basic leucine-zipper 1 (bZIP1)                                                                                                                                                                                                                                                                                                                                      |
| AT5G51670        |                                                | Protein of unknown function (DUF668)                                                                                                                                                                                                                                                                                                                                |
| AT5G52450        |                                                | MATE efflux family protein                                                                                                                                                                                                                                                                                                                                          |
| AT5G52900        |                                                | unknown protein                                                                                                                                                                                                                                                                                                                                                     |
| AT5G53250        | ARABINOGALACTAN PROTEIN 22 (AGP22)             | arabinogalactan protein 22 (AGP22)                                                                                                                                                                                                                                                                                                                                  |
| AT5G54130        |                                                | Calcium-binding endonuclease/exonuclease/phosphatase family                                                                                                                                                                                                                                                                                                         |
| AT5G54380        | THESEUS1 (THE1)                                | Encodes THESEUS1 (THE1), a receptor kinase regulated by Brassinosteroids and required for cell elongation during vegetative growth.                                                                                                                                                                                                                                 |
| AT5G54490        | PINOID-BINDING PROTEIN 1 (PBP1)                | Encodes a PINOID (PID)-binding protein containing putative EF-hand calcium-binding motifs. The interaction is dependent on the presence of calcium. mRNA expression is up-regulated by auxin. Not a phosphorylation target of PID, likely acts upstream of PID to regulate the activity of this protein in response to changes in calcium levels.                   |
| AT5G54500        | FLAVODOXIN-LIKE QUINONE REDUCTASE 1 (FQR1)     | Encodes a flavin mononucleotide-binding flavodoxin-like quinone reductase that is a primary auxin-response gene.                                                                                                                                                                                                                                                    |
| AT5G54510        | DWARF IN LIGHT 1 (DFL1)                        | Encodes an IAA-amido synthase that conjugates Ala, Asp, Phe, and Trp to auxin. Lines overexpressing this gene accumulate IAA-ASP and are hypersensitive to several auxins. Identified as a dominant mutation that displays shorter hypocotyls in light grown plants when compared to wild type siblings. Protein is similar to auxin inducible gene from pea (GH3). |
| AT5G57100        |                                                | Nucleotide/sugar transporter family protein                                                                                                                                                                                                                                                                                                                         |
| AT5G57520        | ZINC FINGER PROTEIN 2 (ZFP2)                   | Encodes a zinc finger protein containing only a single zinc finger.                                                                                                                                                                                                                                                                                                 |
| AT5G60450        | AUXIN RESPONSE FACTOR 4 (ARF4)                 | Encodes a member of the ARF family of transcription factors which mediate auxin responses. ARF4 appears to have redundant function with ETT(ARF3) in specifying abaxial cell identity.                                                                                                                                                                              |
| AT5G60520        |                                                | Late embryogenesis abundant (LEA) protein-related;                                                                                                                                                                                                                                                                                                                  |
| AT5G60660        | PLASMA MEMBRANE INTRINSIC PROTEIN 2;4 (PIP2;4) | A member of the plasma membrane intrinsic protein subfamily PIP2. When expressed in yeast cells can conduct hydrogen peroxide into those cells. Mutants exhibit longer root hairs.                                                                                                                                                                                  |
| AT5G62280        |                                                | Protein of unknown function (DUF1442)                                                                                                                                                                                                                                                                                                                               |
| AT5G64250        |                                                | Aldolase-type TIM barrel family protein                                                                                                                                                                                                                                                                                                                             |
| AT5G65390        | ARABINOGALACTAN PROTEIN 7 (AGP7)               | arabinogalactan protein 7 (AGP7)                                                                                                                                                                                                                                                                                                                                    |
| AT5G65670        | INDOLE-3-ACETIC ACID INDUCIBLE 9 (IAA9)        | auxin (indole-3-acetic acid) induced gene                                                                                                                                                                                                                                                                                                                           |
| AT5G67430        |                                                | Acyl-CoA N-acyltransferases (NAT) superfamily protein                                                                                                                                                                                                                                                                                                               |
