# Supplementary material for: WRKY23 is a component of the transcriptional network mediating auxin feedback on PIN polarity
Source: PubMed Central journal article supplement (PMC5805370; doi:10.1371/journal.pgen.1007177), 2018-01-29
Supplement: pgen.1007177.s007.pdf [file pgen.1007177.s007.pdf]

**S3 Table**

| Primer          | Sequence                         | Reference                        |
|-----------------|----------------------------------|----------------------------------|
| PID_FOR         | 5 -TGCCGACTCTTTACGCTGAG-3        | This study                       |
| PID_REV         | 5 -CTTCGGCGGCATAAAATCTGG-3       | This study                       |
| WRKY23_FOR      | 5 -AGTCTCGGTAATGGTTGCTTTGG-3     | Grunewald et al., 2013           |
| WRKY23_REV      | 5 -TGTTGCTGCTGTTGGTGATGG-3       | Grunewald et al., 2013           |
| SALK_003943_FOR | 5 -CGGTGGGTTTATCAACAAATG-3       | This study                       |
| SALK_003943_REV | 5 -TGTTGCTGCTGTTGGTGATGG-3       | This study                       |
| SALK_38289_FOR  | 5 -CGATCACATTTTTCTTTTCGC-3       | This study                       |
| SALK_38289_REV  | 5 -CGGTGGGTTTATCAACAAATG-3       | This study                       |
| TUB-2_FOR       | 5 -ACTCGTTGGGAGGAGGA-3           | Grunewald et al., 2013           |
| TUB-2_REV       | 5 -ACACCAGACATAGTAGCAGAAATCAAG-3 | Grunewald et al., 2013           |
| IAA14_FOR       | 5 -CCTTCTAAGCCTCCTGCTAAAGC-3     | Shkolnik-Inbar and Bar-Zvi, 2010 |
| IAA14_REV       | 5 -CCGCTCTTCTGATTAGCCATAAC-3     | Tejos et al., 2014               |
| PIP5K1_FOR      | 5 -GGAACATTGTGAATCGAGGACTG-3     | Tejos et al., 2014               |
| PIP5K1_REV      | 5 -CCGTCTCGTCTCTCTACTTCTT-3      | Tejos et al., 2014               |
| PIP5K2_FOR      | 5 -ATGATGCGTGAACCGCTTG-3         | Tejos et al., 2014               |
| PIP5K2_REV      | 5 -TTCCATGCTGCAGGTTGAGCA-3       | Tejos et al., 2014               |
